# Supplementary material for: Enhanced Fermentative Hydrogen Production from Food Waste in Continuous Reactor after Butyric Acid Treatment
Source: MDPI journal article supplement (doi:10.3390/en15114048), 2022-05-31
Supplement: s1 [file s1]

Archive with 1 entries (1 files):
- energies-1744083-supplementary.pdf
