# Supplementary material for: Enhanced Fermentative Hydrogen Production from Food Waste in Continuous Reactor after Butyric Acid Treatment
Source: MDPI journal article supplement (doi:10.3390/en15114048), 2022-05-31
Supplement: s1 [file s1 › energies-1744083-supplementary.pdf]

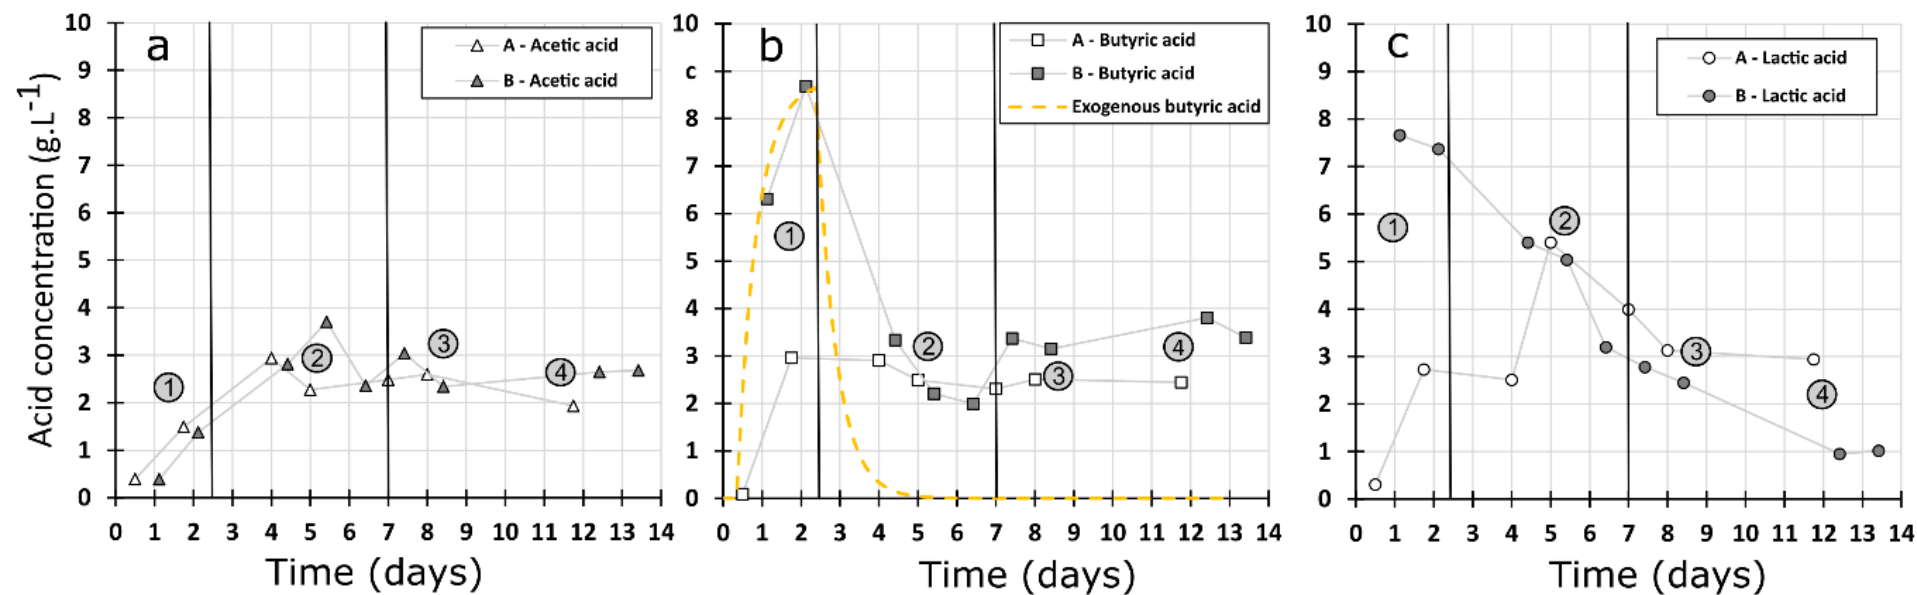

**Figure S1.** Acetic acid (a), butyric acid (b) and lactic acid (c) concentrations in conditions A and B. The four samples used for microbial community characterization in conditions A and B are represented in black circle filled in grey to indicate their time of collection.
